# Supplementary material for: Meridianins Inhibit GSK3β In Vivo and Improve Behavioral Alterations Induced by Chronic Stress
Source: MDPI journal article supplement (doi:10.3390/md20100648), 2022-10-19
Supplement: s1 [file s1]

## Supplementary table

Table S1. Schematic organization of the chronic unpredictable mild stress protocol.

| TIME   | STRESSOR                            |
|--------|-------------------------------------|
| Day 0  | Isolation                           |
| Day 1  | Light-dark cycle alterations (24 h) |
| Day 2  | Forced Swim (5 min)                 |
| Day 3  | Water deprivation (24 h)            |
| Day 4  | Exposition to rat sawdust (4 h)     |
| Day 5  | Home cage inclination (1 h)         |
| Day 6  | Water deprivation (24 h)            |
| Day 7  | Food deprivation (24 h)             |
| Day 8  | Light-dark cycle alterations (24 h) |
| Day 9  | Forced Swim (5 min)                 |
| Day 10 | Restrain (1 h)                      |
| Day 11 | Exposition to rat sawdust (4 h)     |
| Day 12 | Home cage inclination (1 h)         |
| Day 13 | Food deprivation (24 h)             |
| Day 14 | Light-dark cycle alterations (24 h) |
| Day 15 | Water deprivation (24 h)            |
| Day 16 | Forced Swim (5 min)                 |
| Day 17 | Restrain (1 h)                      |
| Day 18 | Exposition to rat sawdust (4 h)     |
| Day 19 | Light-dark cycle alterations (24 h) |
| Day 20 | Home cage inclination (1 h)         |
| Day 21 | Water deprivation (24 h)            |
| Day 22 | Food deprivation (24 h)             |
| Day 23 | Restrain (1 h)                      |
| Day 24 | Forced Swim (5 min)                 |
| Day 25 | Exposition to rat sawdust (4 h)     |
| Day 26 | Restrain (1 h)                      |
| Day 27 | Home cage inclination (1 h)         |
| Day 28 | Food deprivation (24 h)             |
